# Supplementary material
Source: ML conference proceedings conference paper supplement (https://openaccess.thecvf.com/content/ICCV2023/html/Slyman_VLSlice_Interactive_Vision-and-Language_ICCV_2023_paper.html)
Supplement: Supplementary file 1 [file Slyman_VLSlice_Interactive_Vision-and-Language_ICCV_2023_supplemental.pdf]

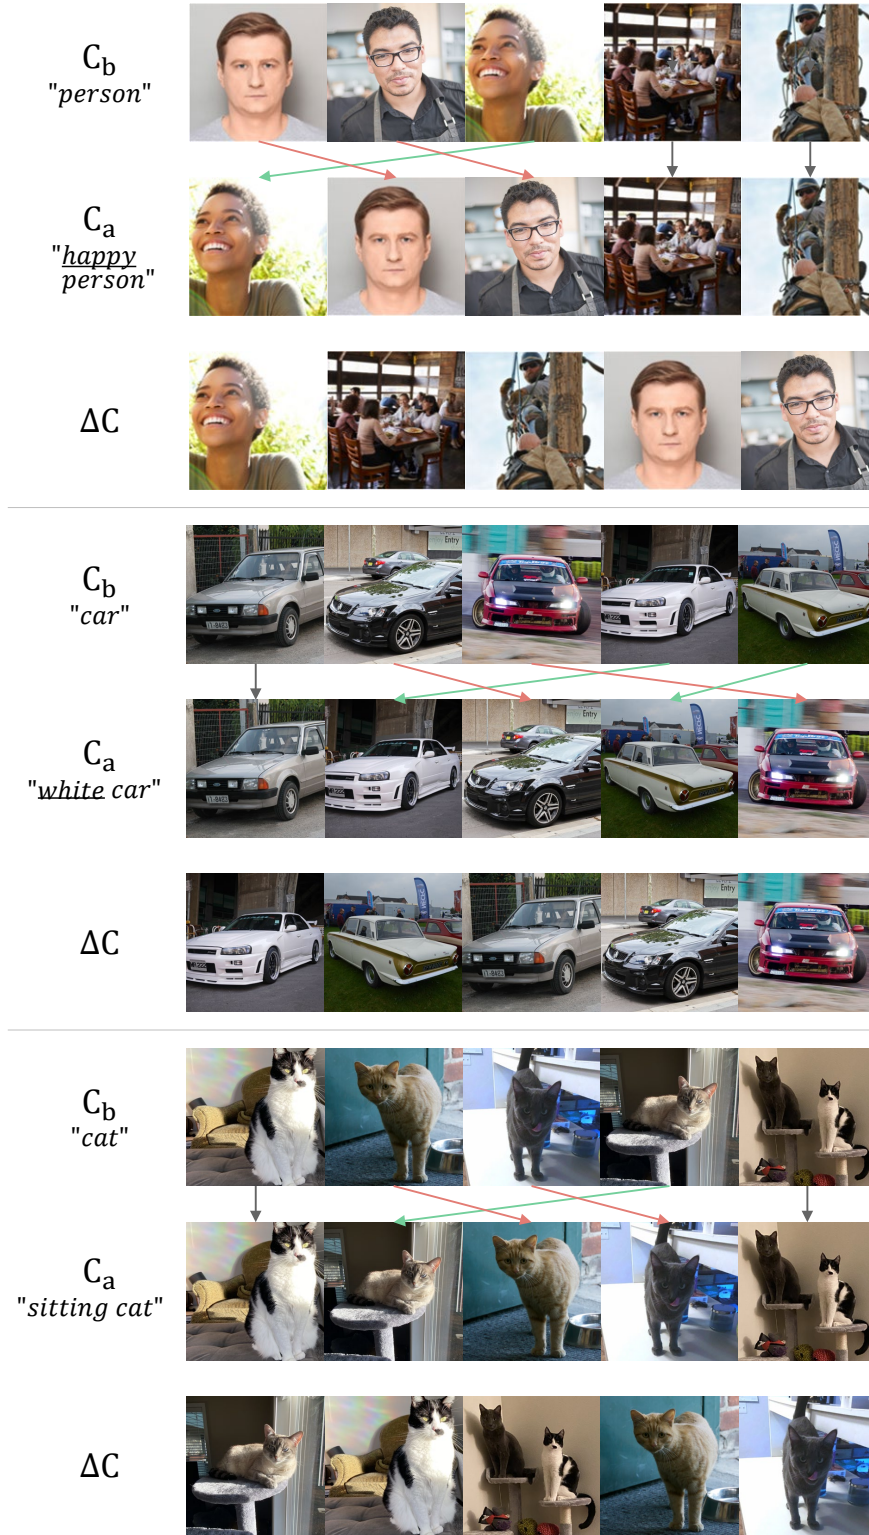

Figure 1: Additional  $\Delta C$  ranking examples where  $C_b$  and  $C_a$  are the baseline and augmented captions, respectively.

| Question                                                         | Response Type                                                        |
|------------------------------------------------------------------|----------------------------------------------------------------------|
| Do you consent to the study?                                     | yes / no                                                             |
| What is your age?                                                | free response                                                        |
| What is your gender?                                             | select all that apply (e.g. <i>non-binary</i> , <i>woman</i> )       |
| What are your pronouns?                                          | select all that apply (e.g. <i>they/them</i> , <i>he/him</i> )       |
| What is your most recent degree program?                         | free response                                                        |
| Do you have at least two years of professional AI/ML experience? | free response                                                        |
| Have you taken three or more AI/ML courses?                      | yes / no                                                             |
| Please list all AI/ML related courses.                           | free response                                                        |
| What is your expertise level in AI/ML?                           | scale (0 - 5)                                                        |
| Do you have ViL experience?                                      | select all that apply (e.g. <i>ViL navigation</i> , <i>VQA</i> )     |
| Describe your experience with the one(s) above.                  | free response                                                        |
| Have you used any tools or libraries for analyzing ViL behavior? | yes / no                                                             |
| Which of the following tools/libraries have you used?            | select all that apply (e.g. <i>TensorBoard</i> , <i>matplotlib</i> ) |
| Can you tell us why you used it and for what purpose?            | free response                                                        |

Table 1: Pre-study questions and response types given before the interface tutorial.

| Question                                                                                     | Response Type  |
|----------------------------------------------------------------------------------------------|----------------|
| The tool was easy to learn how to use.                                                       | Likert (1 - 7) |
| The tool was easy to use.                                                                    | Likert (1 - 7) |
| I felt confident when using the tool.                                                        | Likert (1 - 7) |
| I enjoyed using the tool.                                                                    | Likert (1 - 7) |
| I would like to use a tool like this one again.                                              | Likert (1 - 7) |
| I am confident the image sets I created with this tool capture my intent.                    | Likert (1 - 7) |
| This tool is helpful for finding new model behavior.                                         | Likert (1 - 7) |
| This tool is helpful for confirming my understanding of model behavior.                      | Likert (1 - 7) |
| It was easy to build sets of images capturing a concept I was looking for.                   | Likert (1 - 7) |
| It was easy to find additional relevant images to add to my image sets.                      | Likert (1 - 7) |
| The images within sets I created are coherent with each other.                               | Likert (1 - 7) |
| The image sets I created capture a systemic biased relationship between inputs to the model. | Likert (1 - 7) |
| What was your favorite part of using the tool?                                               | free response  |
| What was the most frustrating part of using the tool?                                        | free response  |
| Are there any other comments you have about this tool?                                       | free response  |

Table 2: Post-study questions and response types given after the participant has completed both tasks.

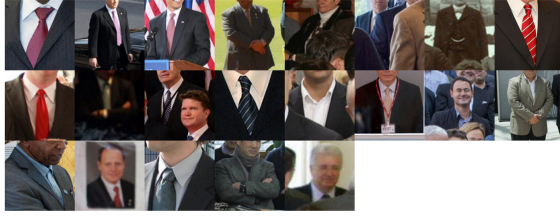

“suits”  $\Delta C > 0$

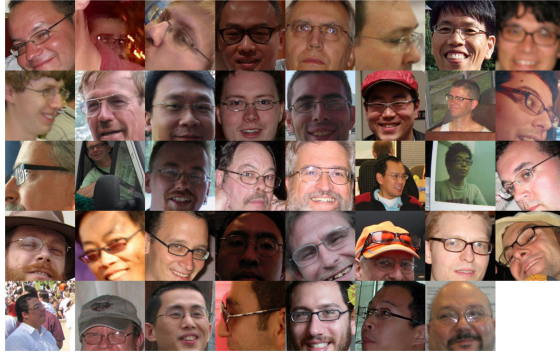

“masculine glasses”  $\Delta C > 0$

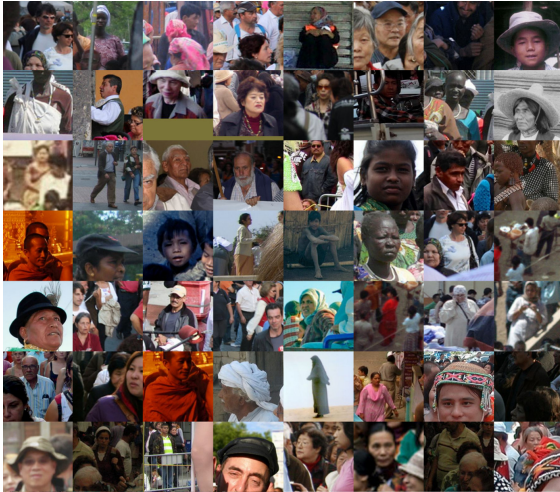

“people of color”  $\Delta C < 0$

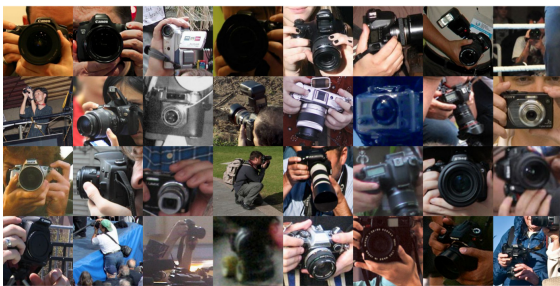

“cameras”  $\Delta C \approx 0$

Figure 2: Additional example slices created by participants for the Person/CEO task with VLSlice.

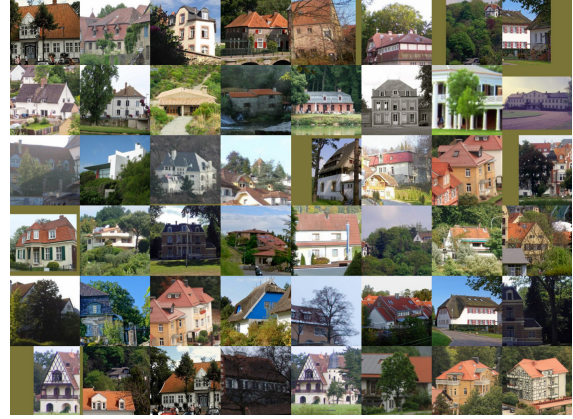

“large european houses”  $\Delta C > 0$

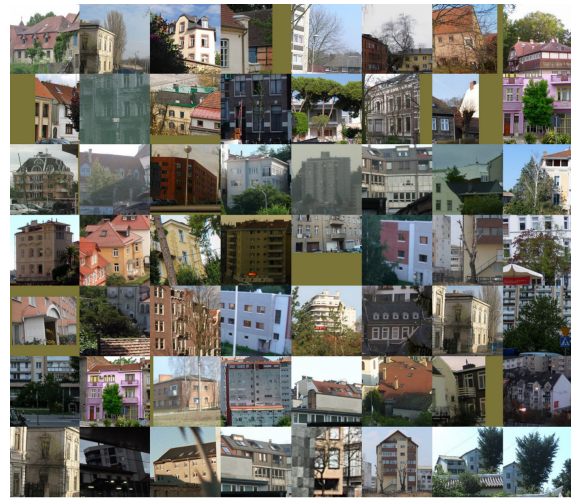

“apartments”  $\Delta C < 0$

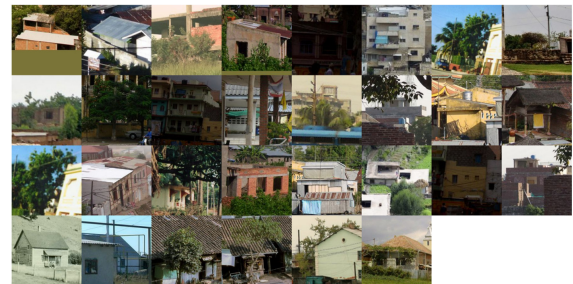

“low-income indian neighborhoods”  $\Delta C < 0$

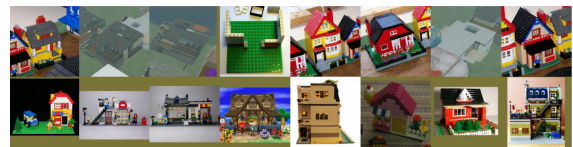

“legos”  $\Delta C \approx 0$

Figure 3: Additional example slices created by participants for the House/Nice House task with VLSlice.

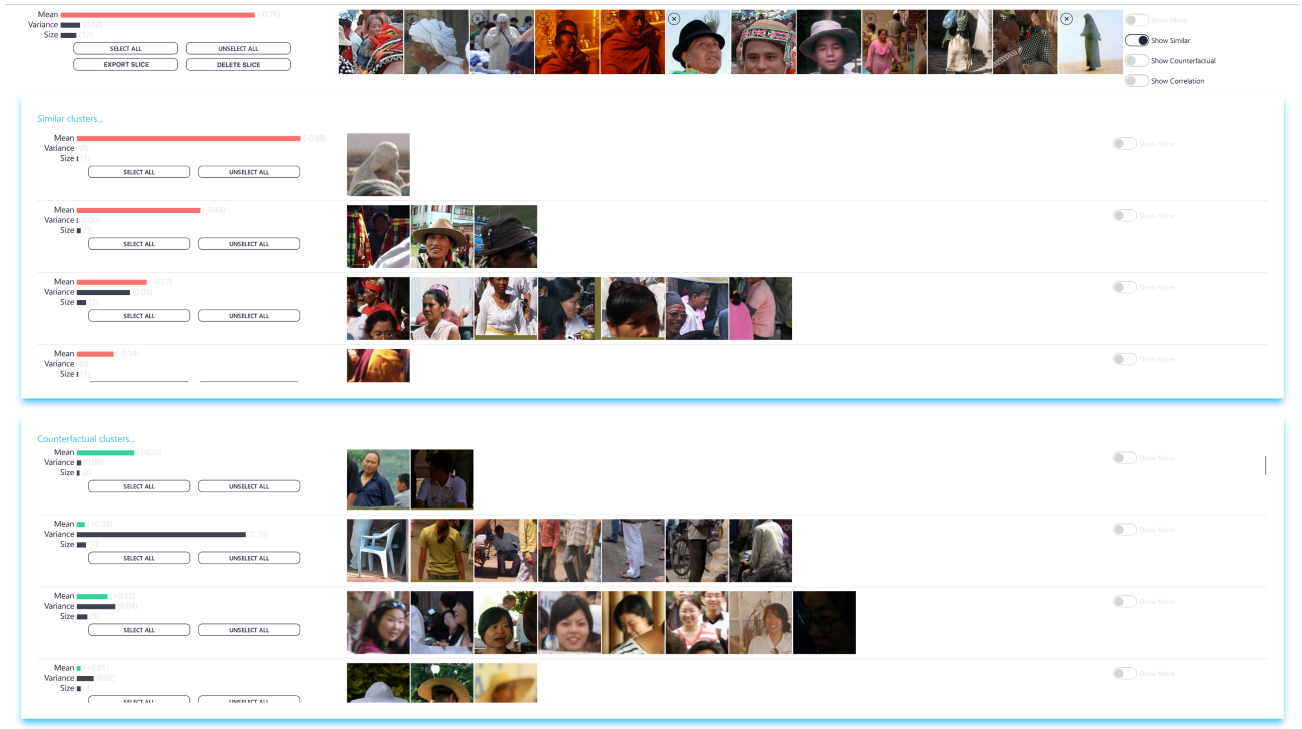

“non-western clothing”  $\Delta C < 0$

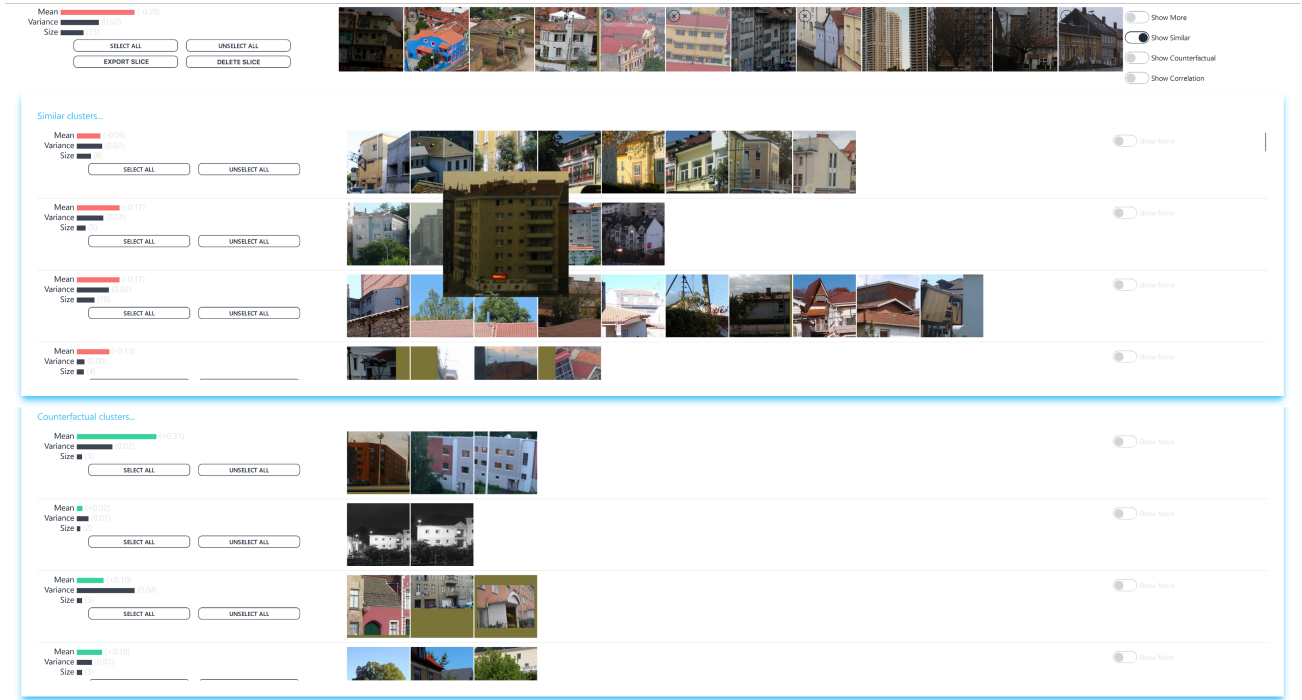

“apartments”  $\Delta C < 0$

Figure 4: VLSlice similar and counterfactual cluster recommendation interface examples.

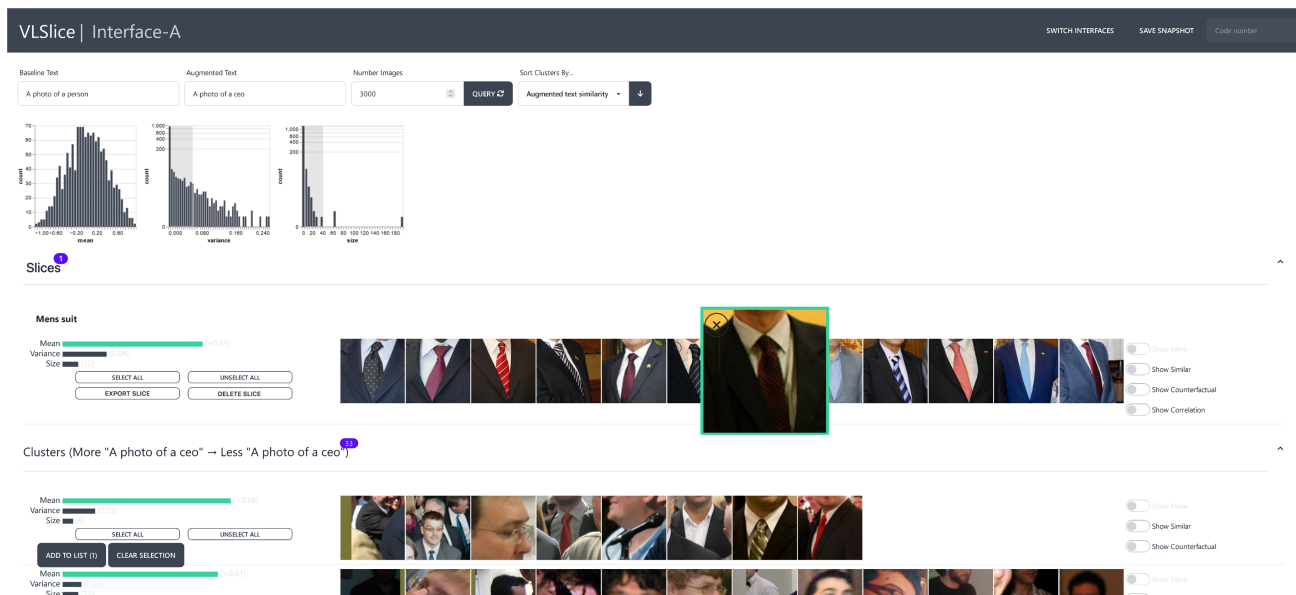

Figure 5: VLSlice interface screenshot. Clicking “show similar” or “show counterfactual” expands to display recommendations like those shown in Fig. 4

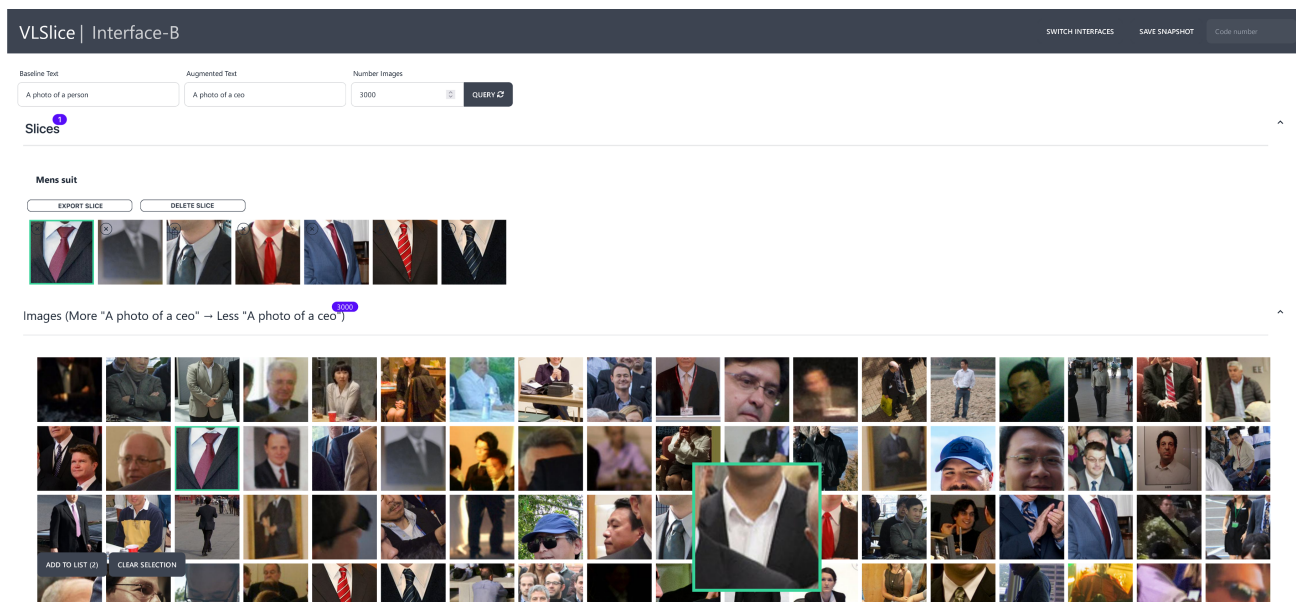

Figure 6: ListSort interface screenshot.

## VLSlice Annotation

Cohesion Representation Viewer

### Slice 0084

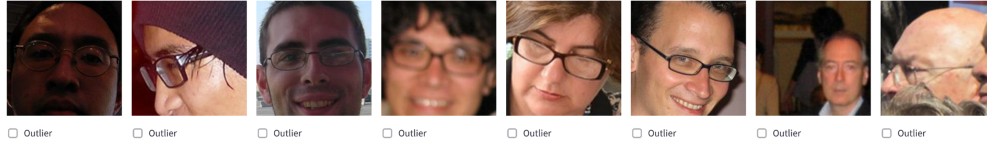

### Slice 0083

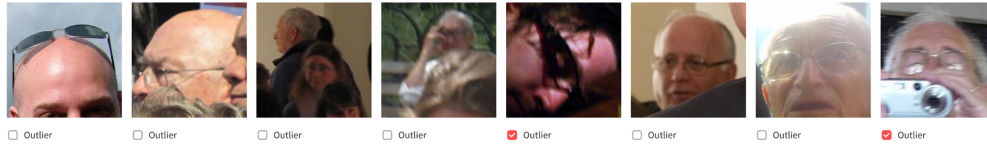

### Slice 0082

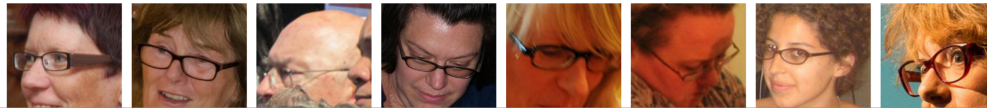

Cohesion Representation Viewer

### masculine\_glasses

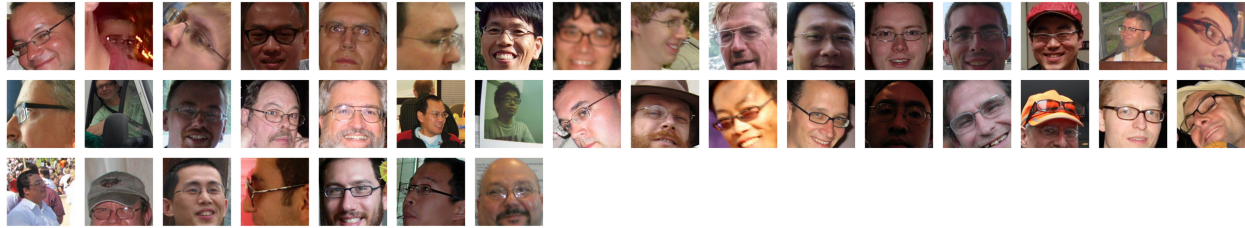

### Other Images

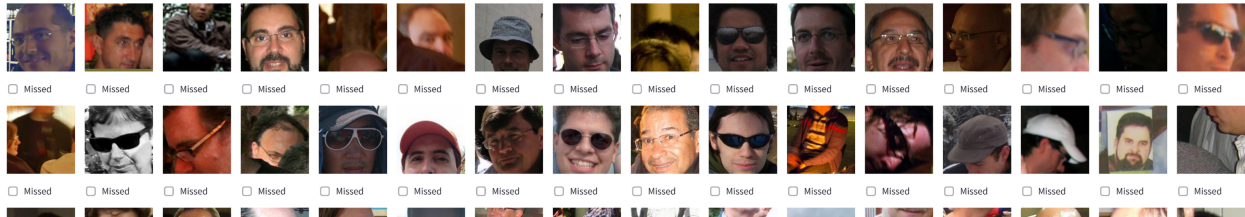

Figure 7: Annotation interface for cohesion (top) and representation (bottom). Annotators select all outlier images for a slice in the first case and any missed images for a slice in the second. No annotator sees the same slice across tasks.
